# Supplementary material for: Joint effects of prenatal exposure to per- and poly-fluoroalkyl substances and psychosocial stressors on corticotropin-releasing hormone during pregnancy
Source: PubMed Central journal article supplement (PMC8492777; doi:10.1038/s41370-021-00322-8), 2021-04-06
Supplement: NIHMS1685102-supplement-1.pdf [file NIHMS1685102-supplement-1.pdf]

**Table S1. Distribution of second trimester plasma levels of corticotropin releasing hormone (pg/mL) and second trimester serum levels of per- and poly-fluoroalkyl substances (ng/mL) with <80% detection (N=497).**

|               | % Above MDL | % Machine Readable | Geometric Mean (Geometric SD) | Percentile      |                  |                  |                  |                  |
|---------------|-------------|--------------------|-------------------------------|-----------------|------------------|------------------|------------------|------------------|
|               |             |                    |                               | 5 <sup>th</sup> | 25 <sup>th</sup> | 50 <sup>th</sup> | 75 <sup>th</sup> | 95 <sup>th</sup> |
| PFDeA         | 69.22       | 92.56              | 0.18 (1.75)                   | <MDL            | <MDL             | 0.16             | 0.24             | 0.49             |
| PFUdA         | 72.03       | 95.77              | 0.14 (1.84)                   | <MDL            | <MDL             | 0.14             | 0.23             | 0.40             |
| PFOSA         | 2.41        | 45.88              | 0.03 (1.66)                   | <MDL            | <MDL             | <MDL             | <MDL             | <MDL             |
| PFBS          | 0.80        | 55.13              | 0.05 (1.73)                   | <MDL            | <MDL             | <MDL             | <MDL             | <MDL             |
| PFHpA         | 11.87       | 68.41              | 0.08 (1.63)                   | <MDL            | <MDL             | <MDL             | <MDL             | 0.19             |
| PFDoA         | 2.21        | 58.95              | 0.28 (1.25)                   | <MDL            | <MDL             | <MDL             | <MDL             | <MDL             |
| Et-PFOSA-AcOH | 10.66       | 70.02              | 0.02 (1.63)                   | <MDL            | <MDL             | <MDL             | <MDL             | 0.05             |

Abbreviations: SD, standard deviation; MDL, method detection limit. Percentile values were calculated with PFAS concentrations below the MDL coded as missing.

**Table S2. Distribution of second trimester serum levels of PFAS (ng/mL) across demographic characteristics and psychosocial stressors.**

|                         |                                    | PFNA                             |             | PFOA                             |             | PFOS                             |             | PFHxS                            |             | Me-PFOA-AcOH                     |             |
|-------------------------|------------------------------------|----------------------------------|-------------|----------------------------------|-------------|----------------------------------|-------------|----------------------------------|-------------|----------------------------------|-------------|
|                         | N                                  | Geometric Mean<br>(Geometric SD) | N           | Geometric Mean<br>(Geometric SD) | N           | Geometric Mean<br>(Geometric SD) | N           | Geometric Mean<br>(Geometric SD) | N           | Geometric Mean<br>(Geometric SD) |             |
| Maternal Age, years     | 18-24                              | 54                               | 0.22 (1.95) | 54                               | 0.57 (1.71) | 54                               | 1.40 (2.05) | 54                               | 0.30 (2.04) | 53                               | 0.06 (2.40) |
|                         | 25-29                              | 66                               | 0.21 (1.85) | 66                               | 0.57 (1.83) | 66                               | 1.23 (2.16) | 66                               | 0.23 (2.15) | 66                               | 0.05 (2.41) |
|                         | 30-34                              | 171                              | 0.34 (2.08) | 172                              | 0.84 (2.14) | 172                              | 2.21 (2.09) | 172                              | 0.45 (2.50) | 172                              | 0.05 (2.01) |
|                         | ≥35                                | 190                              | 0.32 (1.78) | 191                              | 0.73 (1.89) | 191                              | 1.94 (1.88) | 191                              | 0.34 (1.98) | 191                              | 0.05 (2.01) |
| Maternal Education      | Less than High School              | 57                               | 0.22 (1.82) | 58                               | 0.56 (1.82) | 58                               | 1.25 (1.88) | 58                               | 0.22 (1.69) | 58                               | 0.05 (1.82) |
|                         | High School Degree or Some College | 135                              | 0.22 (1.87) | 135                              | 0.54 (1.81) | 135                              | 1.38 (2.14) | 135                              | 0.25 (2.07) | 134                              | 0.05 (2.40) |
|                         | College Degree                     | 113                              | 0.35 (1.88) | 114                              | 0.85 (2.03) | 114                              | 2.16 (1.98) | 114                              | 0.43 (2.40) | 114                              | 0.05 (2.18) |
|                         | Graduate Degree                    | 181                              | 0.37 (1.92) | 181                              | 0.91 (1.91) | 181                              | 2.44 (1.87) | 181                              | 0.48 (2.13) | 181                              | 0.06 (1.94) |
| Maternal Race/Ethnicity | White                              | 182                              | 0.36 (1.85) | 183                              | 0.94 (1.99) | 183                              | 2.34 (1.81) | 183                              | 0.56 (2.14) | 183                              | 0.05 (1.91) |
|                         | Black                              | 36                               | 0.24 (1.78) | 36                               | 0.50 (1.87) | 36                               | 1.46 (2.09) | 36                               | 0.25 (2.00) | 36                               | 0.07 (1.99) |
|                         | Asian/Pacific Islander             | 82                               | 0.37 (1.92) | 82                               | 0.75 (1.86) | 82                               | 2.30 (2.15) | 82                               | 0.34 (2.08) | 82                               | 0.06 (2.35) |
|                         | Latina                             | 171                              | 0.22 (1.85) | 172                              | 0.59 (1.81) | 172                              | 1.36 (2.06) | 172                              | 0.24 (2.02) | 171                              | 0.04 (2.12) |
|                         | Other/Multi-Racial                 | 14                               | 0.53 (2.57) | 14                               | 1.07 (2.15) | 14                               | 2.54 (1.78) | 14                               | 0.43 (2.25) | 14                               | 0.05 (1.65) |
| Parity                  | No Prior Births                    | 239                              | 0.37 (1.99) | 239                              | 1.02 (1.87) | 239                              | 2.32 (2.02) | 239                              | 0.51 (2.27) | 239                              | 0.05 (2.07) |
|                         | One or More Prior Births           | 249                              | 0.24 (1.83) | 251                              | 0.53 (1.78) | 251                              | 1.52 (2.00) | 251                              | 0.25 (1.93) | 250                              | 0.05 (2.15) |
| Marital Status          | Married                            | 324                              | 0.33 (1.96) | 326                              | 0.80 (2.04) | 326                              | 2.08 (2.03) | 326                              | 0.41 (2.35) | 326                              | 0.05 (2.12) |
|                         | Living Together                    | 104                              | 0.25 (2.01) | 104                              | 0.62 (1.82) | 104                              | 1.51 (2.10) | 104                              | 0.27 (2.07) | 104                              | 0.05 (1.97) |
|                         | Single                             | 104                              | 0.25 (1.75) | 104                              | 0.61 (1.78) | 104                              | 1.52 (1.99) | 104                              | 0.29 (1.84) | 104                              | 0.05 (2.39) |
| Perceived Stress        | No                                 | 421                              | 0.31 (1.98) | 422                              | 0.75 (2.01) | 422                              | 1.90 (2.08) | 422                              | 0.37 (2.31) | 421                              | 0.05 (2.10) |
|                         | Yes                                | 61                               | 0.26 (1.86) | 62                               | 0.64 (1.74) | 62                               | 1.73 (2.04) | 62                               | 0.31 (1.96) | 62                               | 0.06 (1.90) |
| Stressful Life Events   | No                                 | 200                              | 0.31 (1.94) | 201                              | 0.78 (2.05) | 201                              | 1.94 (1.98) | 201                              | 0.38 (2.26) | 201                              | 0.05 (1.97) |
|                         | Yes                                | 283                              | 0.29 (1.98) | 284                              | 0.70 (1.93) | 284                              | 1.82 (2.13) | 284                              | 0.34 (2.27) | 283                              | 0.05 (2.22) |
| Depression              | No                                 | 418                              | 0.30 (1.99) | 420                              | 0.74 (2.00) | 420                              | 1.89 (2.04) | 420                              | 0.37 (2.30) | 419                              | 0.05 (2.11) |
|                         | Yes                                | 37                               | 0.28 (1.76) | 37                               | 0.66 (1.84) | 37                               | 1.75 (2.19) | 37                               | 0.28 (1.85) | 37                               | 0.07 (2.10) |
| Financial Strain        | No                                 | 261                              | 0.37 (1.87) | 262                              | 0.92 (1.94) | 262                              | 2.40 (1.87) | 262                              | 0.49 (2.16) | 262                              | 0.05 (1.95) |
|                         | Yes                                | 169                              | 0.24 (1.90) | 170                              | 0.57 (1.90) | 170                              | 1.45 (2.12) | 170                              | 0.26 (2.15) | 169                              | 0.05 (2.21) |
| Food Insecurity         | No                                 | 408                              | 0.31 (1.96) | 409                              | 0.76 (1.98) | 409                              | 1.96 (2.03) | 409                              | 0.38 (2.28) | 408                              | 0.05 (2.08) |
|                         | Yes                                | 75                               | 0.24 (1.95) | 76                               | 0.59 (1.85) | 76                               | 1.41 (2.20) | 76                               | 0.24 (1.98) | 76                               | 0.06 (2.32) |

Abbreviations: SD, standard deviation.

**Table S3. Crude and adjusted linear regression coefficients and 95% confidence intervals for second trimester CRH concentrations (pg/mL) in maternal plasma with an interquartile range increase in second trimester PFAS concentrations (ng/mL) in maternal serum.**

|               | Crude <sup>1</sup> |         |               | Adjusted <sup>2</sup> |         |               |
|---------------|--------------------|---------|---------------|-----------------------|---------|---------------|
|               | N                  | $\beta$ | 95% CI        | N                     | $\beta$ | 95% CI        |
| PFNA          | 489                | 6.26    | (3.31, 9.21)  | 464                   | 5.17    | (1.79, 8.55)  |
| PFOA          | 491                | 5.11    | (1.70, 8.52)  | 466                   | 3.62    | (-0.42, 7.66) |
| PFOS          | 491                | 4.38    | (1.06, 7.70)  | 466                   | 1.99    | (-1.92, 5.9)  |
| PFHxS         | 490                | 0.69    | (-2.19, 3.58) | 466                   | 0.33    | (-3.73, 4.39) |
| Me-PFOSA-AcOH | 491                | 2.96    | (-0.34, 6.25) | 465                   | -0.26   | (-3.28, 2.75) |

<sup>1</sup>Adjusted for gestational age at visit.

<sup>2</sup>Adjusted for gestational age at visit, maternal age (continuous), maternal education, maternal race/ethnicity, and parity.

Abbreviations: CI, confidence interval.

**Table S4. Crude and adjusted linear regression coefficients and 95% confidence intervals for the associations between psychosocial stressors and second trimester CRH concentrations (pg/mL) in maternal plasma.**

|                       |     | Crude <sup>1</sup> |         |                | Adjusted <sup>2</sup> |         |                |
|-----------------------|-----|--------------------|---------|----------------|-----------------------|---------|----------------|
|                       |     | N                  | $\beta$ | 95% CI         | N                     | $\beta$ | 95% CI         |
| Financial Strain      | No  | 261                | Ref     | Ref            | 254                   | Ref     | Ref            |
|                       | Yes | 167                | -5.28   | (-11.07, 0.5)  | 156                   | 4.42    | (-5.42, 14.25) |
| Food Insecurity       | No  | 408                | Ref     | Ref            | 391                   | Ref     | Ref            |
|                       | Yes | 73                 | -4.92   | (-12.15, 2.32) | 70                    | 1.92    | (-6.25, 10.09) |
| Stressful Life Events | No  | 201                | Ref     | Ref            | 197                   | Ref     | Ref            |
|                       | Yes | 280                | 1.66    | (-3.63, 6.95)  | 264                   | 3.79    | (-1.75, 9.33)  |
| Perceived Stress      | No  | 419                | Ref     | Ref            | 404                   | Ref     | Ref            |
|                       | Yes | 61                 | 2.57    | (-5.29, 10.43) | 57                    | 10.2    | (1.82, 18.57)  |
| Depression            | No  | 417                | Ref     | Ref            | 400                   | Ref     | Ref            |
|                       | Yes | 36                 | -3.23   | (-13.27, 6.8)  | 33                    | 5.09    | (-5.67, 15.85) |

<sup>1</sup>Adjusted for gestational age at visit.

<sup>2</sup>Adjusted for gestational age at visit, maternal age (continuous), maternal education, maternal race/ethnicity, and parity.  
Abbreviations: CI, confidence interval.

**Table S5. Crude and adjusted linear regression coefficients and 95% confidence intervals for second trimester CRH concentrations (pg/mL) in maternal plasma with an interquartile range increase in second trimester PFAS concentrations (ng/mL) in maternal serum stratified by stressful life events.**

|              |                            | Crude <sup>1</sup> |         |               |               | Adjusted <sup>2</sup> |         |               |               |
|--------------|----------------------------|--------------------|---------|---------------|---------------|-----------------------|---------|---------------|---------------|
|              |                            | N                  | $\beta$ | 95% CI        | P interaction | N                     | $\beta$ | 95% CI        | P interaction |
| PFNA         | Stressful Life Events– Yes | 279                | 7.62    | (3.95, 11.29) | 0.53          | 263                   | 7.06    | (2.82, 11.3)  | 0.49          |
|              | Stressful Life Events– No  | 200                | 5.59    | (0.57, 10.61) |               | 196                   | 2.29    | (-3.45, 8.03) |               |
| PFOA         | Stressful Life Events– Yes | 280                | 4.84    | (0.43, 9.25)  | 0.9           | 264                   | 3.62    | (-1.76, 8.99) | 0.40          |
|              | Stressful Life Events– No  | 201                | 5.24    | (0.00, 10.48) |               | 197                   | 3.56    | (-2.86, 9.98) |               |
| PFOS         | Stressful Life Events– Yes | 280                | 5.26    | (1.03, 9.50)  | 0.71          | 264                   | 2.77    | (-2.10, 7.65) | 0.79          |
|              | Stressful Life Events– No  | 201                | 6.43    | (0.46, 12.4)  |               | 197                   | 1.00    | (-5.90, 7.91) |               |
| PFHxS        | Stressful Life Events– Yes | 280                | 3.63    | (-0.58, 7.84) | 0.98          | 264                   | 0.86    | (-4.33, 6.06) | 0.89          |
|              | Stressful Life Events– No  | 201                | 3.59    | (-1.88, 9.07) |               | 197                   | -0.42   | (-7.16, 6.32) |               |
| Me-PFOA-AcOH | Stressful Life Events– Yes | 279                | 0.24    | (-3.20, 3.69) | 0.69          | 263                   | -0.89   | (-4.66, 2.88) | 0.93          |
|              | Stressful Life Events– No  | 201                | 1.5     | (-3.74, 6.74) |               | 197                   | 0.65    | (-4.55, 5.85) |               |

<sup>1</sup>Adjusted for gestational age at visit.

<sup>2</sup>Adjusted for gestational age at visit, maternal age (continuous), maternal education, maternal race/ethnicity, and parity.

Abbreviations: CI, confidence interval.

**Table S6. Crude and adjusted linear regression coefficients and 95% confidence intervals for second trimester CRH concentrations (pg/mL) in maternal plasma with an interquartile range increase in second trimester PFAS concentrations (ng/mL) in maternal serum stratified by perceived stress.**

|              |                        | Crude <sup>1</sup> |         |                 |               | Adjusted <sup>2</sup> |         |                |               |
|--------------|------------------------|--------------------|---------|-----------------|---------------|-----------------------|---------|----------------|---------------|
|              |                        | N                  | $\beta$ | 95% CI          | P interaction | N                     | $\beta$ | 95% CI         | P interaction |
| PFNA         | Perceived Stress – Yes | 60                 | 3.87    | (-5.04, 12.78)  | 0.5           | 56                    | 3.45    | (-6.59, 13.48) | 0.55          |
|              | Perceived Stress – No  | 418                | 7.23    | (4.05, 10.41)   |               | 403                   | 5.55    | (1.92, 9.19)   |               |
| PFOA         | Perceived Stress – Yes | 61                 | -1.00   | (-12.08, 10.09) | 0.29          | 57                    | -3.15   | (-15.91, 9.60) | 0.44          |
|              | Perceived Stress – No  | 419                | 5.59    | (2.03, 9.14)    |               | 404                   | 4.61    | (0.28, 8.95)   |               |
| PFOS         | Perceived Stress – Yes | 61                 | 4.25    | (-5.40, 13.9)   | 0.8           | 57                    | 4.76    | (-6.32, 15.84) | 0.86          |
|              | Perceived Stress – No  | 419                | 5.63    | (1.91, 9.35)    |               | 404                   | 1.69    | (-2.58, 5.95)  |               |
| PFHxS        | Perceived Stress – Yes | 61                 | 2.70    | (-8.14, 13.55)  | 0.88          | 57                    | 2.80    | (-8.91, 14.51) | 0.97          |
|              | Perceived Stress – No  | 419                | 3.66    | (0.12, 7.2)     |               | 404                   | 0.41    | (-4.04, 4.86)  |               |
| Me-PFOA-AcOH | Perceived Stress – Yes | 61                 | -2.82   | (-11.84, 6.21)  | 0.47          | 57                    | -3.66   | (-13.61, 6.92) | 0.99          |
|              | Perceived Stress – No  | 418                | 0.97    | (-2.22, 4.15)   |               | 403                   | -0.43   | (-3.68, 2.81)  |               |

<sup>1</sup>Adjusted for gestational age at visit.

<sup>2</sup>Adjusted for gestational age at visit, maternal age (continuous), maternal education, maternal race/ethnicity, and parity.

Abbreviations: CI, confidence interval.

Note: among those who experienced perceived stress, no participants self-identified as “other/multi-racial” race/ethnicity and maternal race/ethnicity was modeled as 4 categories.

**Table S7. Crude and adjusted linear regression coefficients and 95% confidence intervals for second trimester CRH concentrations (pg/mL) in maternal plasma with an interquartile range increase in second trimester PFAS concentrations (ng/mL) in maternal serum stratified by depression.**

|               |                  | Crude <sup>1</sup> |         |                 |               | Adjusted <sup>2</sup> |         |                 |               |
|---------------|------------------|--------------------|---------|-----------------|---------------|-----------------------|---------|-----------------|---------------|
|               |                  | N                  | $\beta$ | 95% CI          | P interaction | N                     | $\beta$ | 95% CI          | P interaction |
| PFNA          | Depression – Yes | 36                 | 13.21   | (2.03, 24.39)   | 0.33          | 33                    | 20.77   | (1.56, 39.99)   | 0.47          |
|               | Depression – No  | 415                | 6.41    | (3.19, 9.64)    |               | 398                   | 4.9     | (1.23, 8.56)    |               |
| PFOA          | Depression – Yes | 36                 | 4.65    | (-7.83, 17.14)  | 0.99          | 33                    | 7.06    | (-11.96, 26.07) | 0.4           |
|               | Depression – No  | 417                | 4.78    | (1.15, 8.41)    |               | 400                   | 3.78    | (-0.65, 8.21)   |               |
| PFOS          | Depression – Yes | 36                 | 1.16    | (-10.68, 13.0)  | 0.45          | 33                    | -3.88   | (-27.33, 19.56) | 0.74          |
|               | Depression – No  | 417                | 6.19    | (2.32, 10.06)   |               | 400                   | 2.73    | (-1.71, 7.17)   |               |
| PFHxS         | Depression – Yes | 36                 | -0.87   | (-15.86, 14.12) | 0.58          | 33                    | -10.23  | (-41.98, 21.52) | 0.83          |
|               | Depression – No  | 417                | 3.91    | (0.3, 7.52)     |               | 400                   | 1.16    | (-3.33, 5.64)   |               |
| Me-PFOSA-AcOH | Depression – Yes | 36                 | -4.45   | (-14.31, 5.41)  | 0.3           | 33                    | -10.12  | (-29.15, 8.91)  | 0.93          |
|               | Depression – No  | 416                | 1.68    | (-1.53, 4.88)   |               | 399                   | 0.37    | (-2.92, 3.66)   |               |

<sup>1</sup>Adjusted for gestational age at visit.

<sup>2</sup>Adjusted for gestational age at visit, maternal age (continuous), maternal education, maternal race/ethnicity, and parity.

Abbreviations: CI, confidence interval.

**Table S8. Crude and adjusted linear regression coefficients and 95% confidence intervals for second trimester CRH concentrations (pg/mL) in maternal plasma with an interquartile range increase in second trimester PFAS concentrations (ng/mL) in maternal serum stratified by food insecurity.**

|                       | N   | Crude <sup>1</sup> |                |               | Adjusted <sup>2</sup> |         |                |               |
|-----------------------|-----|--------------------|----------------|---------------|-----------------------|---------|----------------|---------------|
|                       |     | $\beta$            | 95% CI         | P interaction | N                     | $\beta$ | 95% CI         | P interaction |
| PFNA                  |     |                    |                |               |                       |         |                |               |
| Food Insecurity – Yes | 72  | 8.41               | (1.51, 15.3)   | 0.62          | 69                    | 9.52    | (1.72, 17.32)  | 0.56          |
| Food Insecurity – No  | 407 | 6.13               | (2.83, 9.42)   |               | 390                   | 4.68    | (0.89, 8.48)   |               |
| PFOA                  |     |                    |                |               |                       |         |                |               |
| Food Insecurity – Yes | 73  | 6.6                | (-1.89, 15.09) | 0.76          | 70                    | 5.06    | (-4.91, 15.03) | 0.46          |
| Food Insecurity – No  | 408 | 4.48               | (0.78, 8.19)   |               | 391                   | 3.75    | (-0.79, 8.29)  |               |
| PFOS                  |     |                    |                |               |                       |         |                |               |
| Food Insecurity – Yes | 73  | 5.51               | (-1.97, 12.99) | 0.99          | 70                    | 8.07    | (-0.92, 17.06) | 0.83          |
| Food Insecurity – No  | 408 | 5.23               | (1.31, 9.15)   |               | 391                   | 1.78    | (-2.71, 6.26)  |               |
| PFHxS                 |     |                    |                |               |                       |         |                |               |
| Food Insecurity – Yes | 73  | 8.2                | (-0.9, 17.3)   | 0.31          | 70                    | 8.2     | (-3.12, 19.51) | 0.96          |
| Food Insecurity – No  | 408 | 2.42               | (-1.25, 6.09)  |               | 391                   | -0.11   | (-4.55, 4.33)  |               |
| Me-PFOSA-AcOH         |     |                    |                |               |                       |         |                |               |
| Food Insecurity – Yes | 73  | 0.32               | (-5.62, 6.26)  | 0.91          | 70                    | 2.99    | (-3.79, 9.78)  | 0.99          |
| Food Insecurity – No  | 407 | 0.95               | (-2.34, 4.25)  |               | 390                   | -0.56   | (-4.09, 2.97)  |               |

<sup>1</sup>Adjusted for gestational age at visit.

<sup>2</sup>Adjusted for gestational age at visit, maternal age (continuous), maternal education, maternal race/ethnicity, and parity.

Abbreviations: CI, confidence interval.



**Table S9. Crude and adjusted linear regression coefficients and 95% confidence intervals for second trimester CRH concentrations (pg/mL) in maternal plasma with an interquartile range increase in second trimester PFAS concentrations (ng/mL) in maternal serum stratified by financial strain.**

|               |                        | Crude <sup>1</sup> |         |                |               | Adjusted <sup>2</sup> |         |                |               |
|---------------|------------------------|--------------------|---------|----------------|---------------|-----------------------|---------|----------------|---------------|
|               |                        | N                  | $\beta$ | 95% CI         | P interaction | N                     | $\beta$ | 95% CI         | P interaction |
| PFNA          | Financial Strain – Yes | 166                | 11.56   | (6.56, 16.55)  | 0.02          | 155                   | 10.61   | (4.9, 16.33)   | 0.79          |
|               | Financial Strain – No  | 260                | 2.57    | (-2.13, 7.26)  |               | 253                   | 3.00    | (-2.05, 8.05)  |               |
| PFOA          | Financial Strain – Yes | 167                | 8.16    | (2.33, 13.98)  | 0.12          | 156                   | 6.1     | (-0.49, 12.69) | 0.68          |
|               | Financial Strain – No  | 261                | 1.22    | (-3.79, 6.22)  |               | 254                   | 3.03    | (-3.09, 9.15)  |               |
| PFOS          | Financial Strain – Yes | 167                | 8       | (2.48, 13.53)  | 0.11          | 156                   | 4.63    | (-1.82, 11.09) | 0.99          |
|               | Financial Strain – No  | 261                | 0.2     | (-5.63, 6.03)  |               | 254                   | -0.05   | (-6.09, 5.99)  |               |
| PFHxS         | Financial Strain – Yes | 167                | 5.24    | (-0.59, 11.08) | 0.09          | 156                   | 1.59    | (-5.01, 8.18)  | 0.81          |
|               | Financial Strain – No  | 261                | -1.55   | (-6.65, 3.55)  |               | 254                   | -1.01   | (-7.01, 4.99)  |               |
| Me-PFOSA-AcOH | Financial Strain – Yes | 166                | 1.41    | (-3.11, 5.93)  | 0.66          | 155                   | 0.23    | (-4.84, 5.3)   | 0.87          |
|               | Financial Strain – No  | 261                | -0.34   | (-5.02, 4.35)  |               | 254                   | -0.02   | (-5.01, 4.98)  |               |

<sup>1</sup>Adjusted for gestational age at visit.

<sup>2</sup>Adjusted for gestational age at visit, maternal age (continuous), maternal education, maternal race/ethnicity, and parity.

Abbreviations: CI, confidence interval.
